# Supplementary material
Source: publisher site journal article supplement (https://www.spandidos-publications.com/1287/downloadSupplementary)
Supplement: Supplementary file 1 [file downloadSupplementary]

## Sheet: Supplementary Table S2
	Table SIV. The level of HDGF protein in the EBC-1 supernatant.
	Protein	Sample	Value (ng/ml) (means ± standard errors)
	HDGF	Serum-free culture supernatant derived from EBC-1 cells at 50 µg/ml	1.67±0.26
